# Supplementary material
Source: PubMed Central journal article supplement (PMC4521230)
Supplement: NIHMS500345-supplement-3.pdf [file NIHMS500345-supplement-3.pdf]

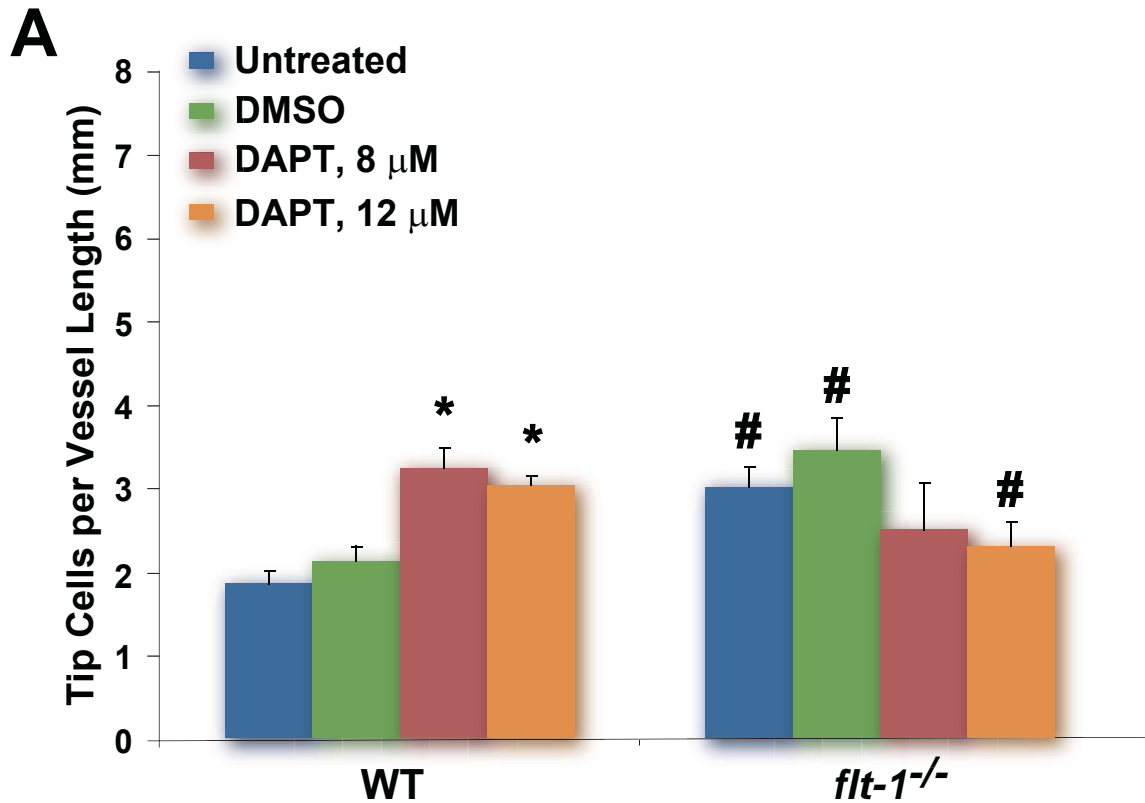

Supplemental Figure I. DAPT treatment induces more tip cells from WT vessels but not *flt-1*<sup>-/-</sup> vessels, and an increased DAPT concentration does not alter these responses. Dy 7 tip cells per vessel length (A). \*,  $p \leq 0.004$  vs. WT/untreated or WT/DMSO. #,  $p \leq 0.03$  vs. WT of same treatment group. Values are averages  $\pm$  standard error of the mean (SEM).

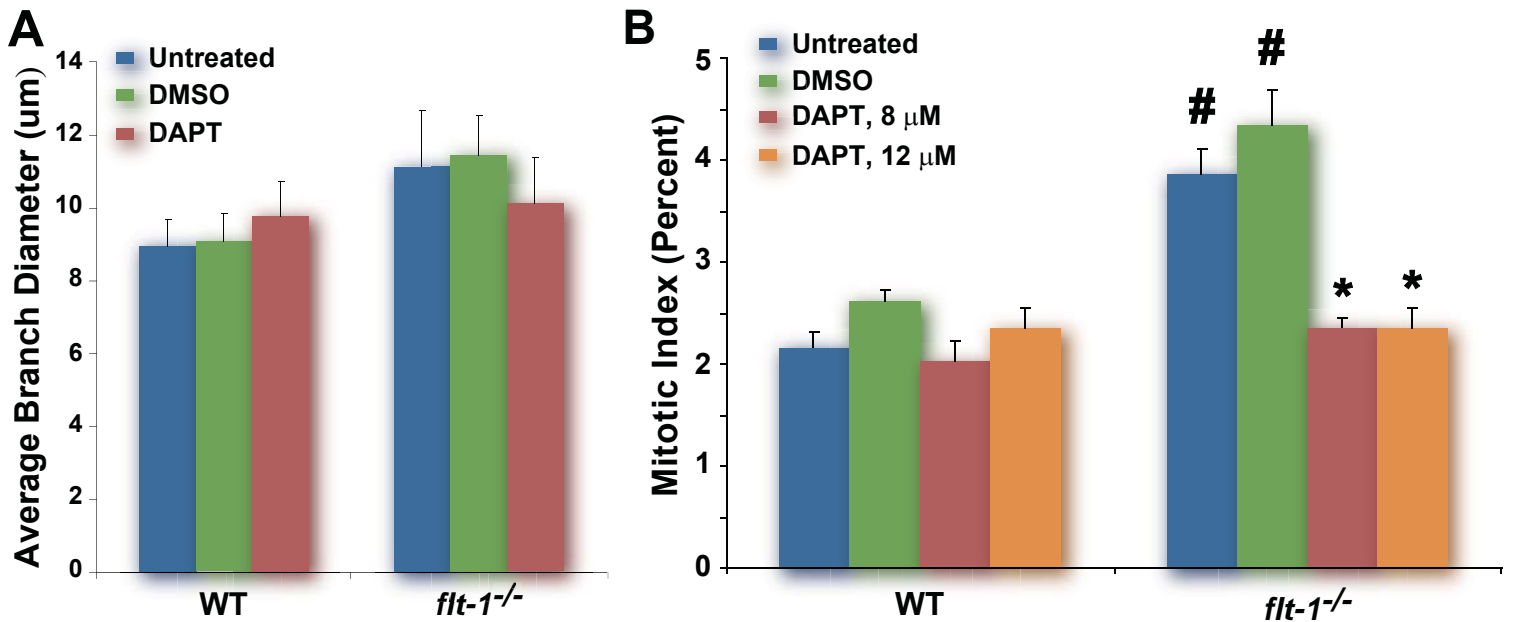

Supplemental Figure II. Vessel diameter is unaffected by Notch inhibition, and endothelial cell proliferation is unaffected by an increased dose of DAPT. Dy 8 vessel networks assessed for average vessel branch diameter (A). Dy 7 vessel mitotic indices were quantified by counting PH3+/PECAM-1+ cells and normalizing to total PECAM-1+ cells (B). #,  $p \leq 0.04$  vs. WT of same treatment group. \*,  $p \leq 0.05$  vs. *flt-1*<sup>-/-</sup>/untreated or *flt-1*<sup>-/-</sup>/DMSO. Values are averages +/- standard error of the mean (SEM).

## Data Supplement

### Methods

#### *ES Cell Culture and In Vitro Differentiation*

Wild-type (WT) and *flt-1*<sup>-/-</sup> (gift of G.H. Fong) mouse ES cell maintenance and differentiation was as described.<sup>1</sup> The  $\gamma$ -secretase inhibitor IX, DAPT (N-[N-(3,5-Difluorophenacetyl-L-alanyl)]-S-phenylglycine t-Butyl Ester, Santa Cruz Biotechnology, Inc.), was resuspended in DMSO (Sigma), and added to ES cell cultures at 8 and 12  $\mu$ M on dy 5 and 7.

#### *ES Cell Antibody Staining and Quantitative Analysis*

Fixation and staining of dy 7 and 8 ES cell cultures was as described.<sup>2</sup> Primary antibodies used were: rat anti-mouse PECAM-1 (BD Biosciences) at 1:1000, and rabbit polyclonal anti-phospho-Histone H3 (ser10, EMD Millipore) at 1:500. Secondary antibodies were donkey anti-rat AlexaFluor488 (IgG; H+L) at 1:1000 (Invitrogen), and donkey anti-rabbit AlexaFluor568 (IgG; H+L) at 1:500 (Invitrogen). Incubation with DAPI for 30 min followed all staining.

ES cell cultures were imaged with a confocal microscope (Leica TCS SP5) using a  $\times 40$  objective (HCX PL APO oil), and 6-10 z-axis confocal scans were acquired and flattened when necessary. Vessel images were traced and processed using ImageJ plugins (BoneJ/Skeletonise 3D, Skeleton/AnalyzeSkeleton (2D/3D)) to generate vessel length values. A tip cell was defined as a cell oriented away from a parent vessel, extending filopodia but not obviously engaged with a target cell, and emerging from a parent vessel with its nucleus clearly beyond the axis of the parent vessel. For dy 7 cultures from each treatment group/dose and cell type, tip cells were counted and normalized to vessel length. For these same dy 7 cultures, ImageJ was used to count phospho-Histone H3+ (PH3+) mitotic endothelial cells and total endothelial cells, to yield a mitotic index (PH3+ and PECAM+ cells per total PECAM+ cells) for each image. Vessel diameter for dy 8 cultures was also measured using ImageJ by determining the midpoint of a vessel between two branch points and measuring the vessel width perpendicular to the vessel axis.

#### *Statistics*

Statistical comparison of ES cell-derived vessel diameter and tip cell numbers was done using the Student's two-tailed t-test. Mitotic index values were compared using  $\chi^2$  analysis.

## References

1. Kearney JB, Bautch VL. In vitro differentiation of mouse ES cells: hematopoietic and vascular development. *Methods Enzymol.* 2003;365:83-98.
2. Kappas NC, Zeng G, Chappell JC, Kearney JB, Hazarika S, Kallianos KG, Patterson C, Annex BH, Bautch VL. The VEGF receptor Flt-1 spatially modulates Flk-1 signaling and blood vessel branching. *J Cell Biol.* 2008;181:847-858.

## Supplemental Figure Legends

**Supplemental Figure I. DAPT treatment induces more tip cells from WT vessels but not *flt-1*<sup>-/-</sup> vessels, and an increased DAPT concentration does not alter these responses.** Dy 7 tip cells per vessel length (A). \*,  $p \leq 0.004$  vs. WT/untreated or WT/DMSO. #,  $p \leq 0.03$  vs. WT of same treatment group. Values are averages +/- standard error of the mean (SEM).

**Supplemental Figure II. Vessel diameter is unaffected by Notch inhibition, and endothelial proliferation is unaffected by an increased dose of DAPT.** Dy 8 vessel networks assessed for average vessel branch diameter (A). Dy 7 vessel mitotic indexes were quantified by counting PH3+/PECAM-1+ cells and normalizing to total PECAM-1+ cells (B). #,  $p \leq 0.04$  vs. WT of same treatment group. \*,  $p \leq 0.05$  vs. *flt-1*<sup>-/-</sup>/untreated or *flt-1*<sup>-/-</sup>/DMSO. Values are averages +/- SEM.
