# Supplementary material
Source: PubMed Central journal article supplement (PMC4521230)

**Supplemental Material**

**Supplemental Figure I. DAPT treatment induces more tip cells from WT vessels but not *flt-1*<sup>-/-</sup> vessels, and an increased DAPT concentration does not alter these responses.** Dy 7 tip cells per vessel length (A). \*,  $p \leq 0.004$  vs. WT/untreated or WT/DMSO. #,  $p \leq 0.03$  vs. WT of same treatment group. Values are averages +/- standard error of the mean (SEM).

**Supplemental Figure II. Vessel diameter is unaffected by Notch inhibition, and endothelial proliferation is unaffected by an increased dose of DAPT.** Dy 8 vessel networks assessed for average vessel branch diameter (A). Dy 7 vessel mitotic indexes were quantified by counting PH3+/PECAM-1+ cells and normalizing to total PECAM-1+ cells (B). #,  $p \leq 0.04$  vs. WT of same treatment group. \*,  $p \leq 0.05$  vs. *flt-1*<sup>-/-</sup>/untreated or *flt-1*<sup>-/-</sup>/DMSO. Values are averages +/- SEM.

Supplemental Figure I.

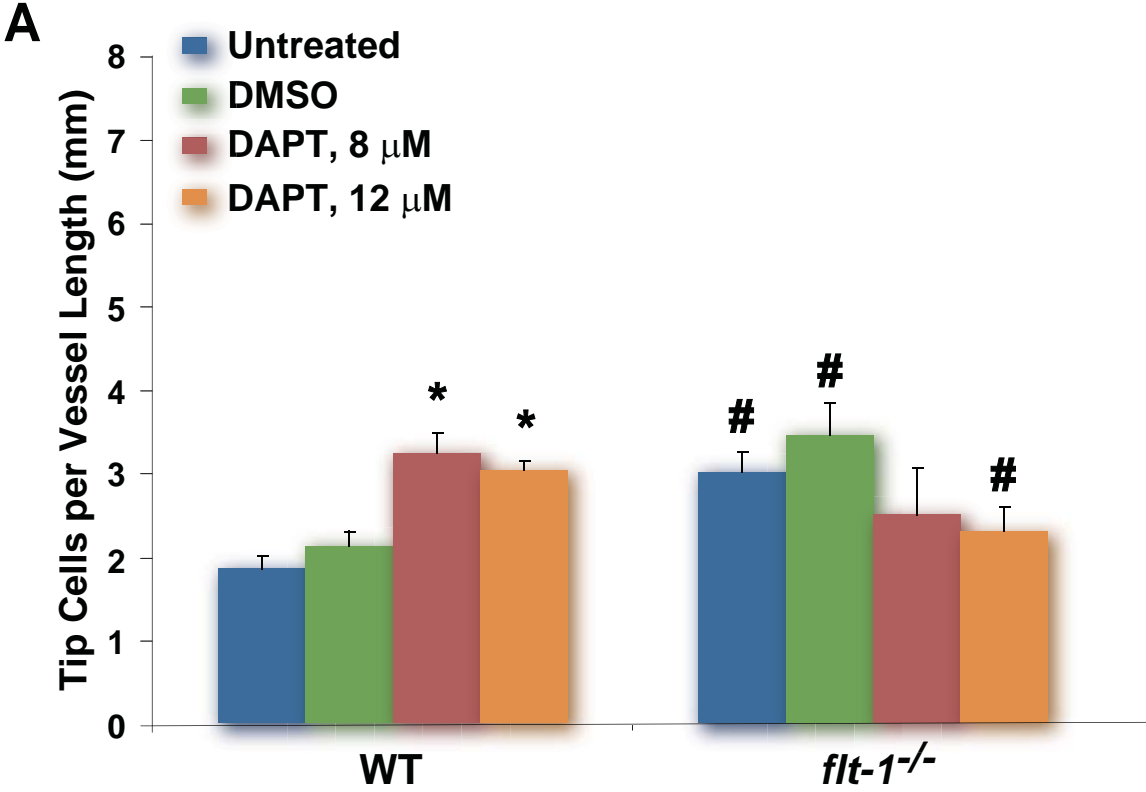

Supplemental Figure II.

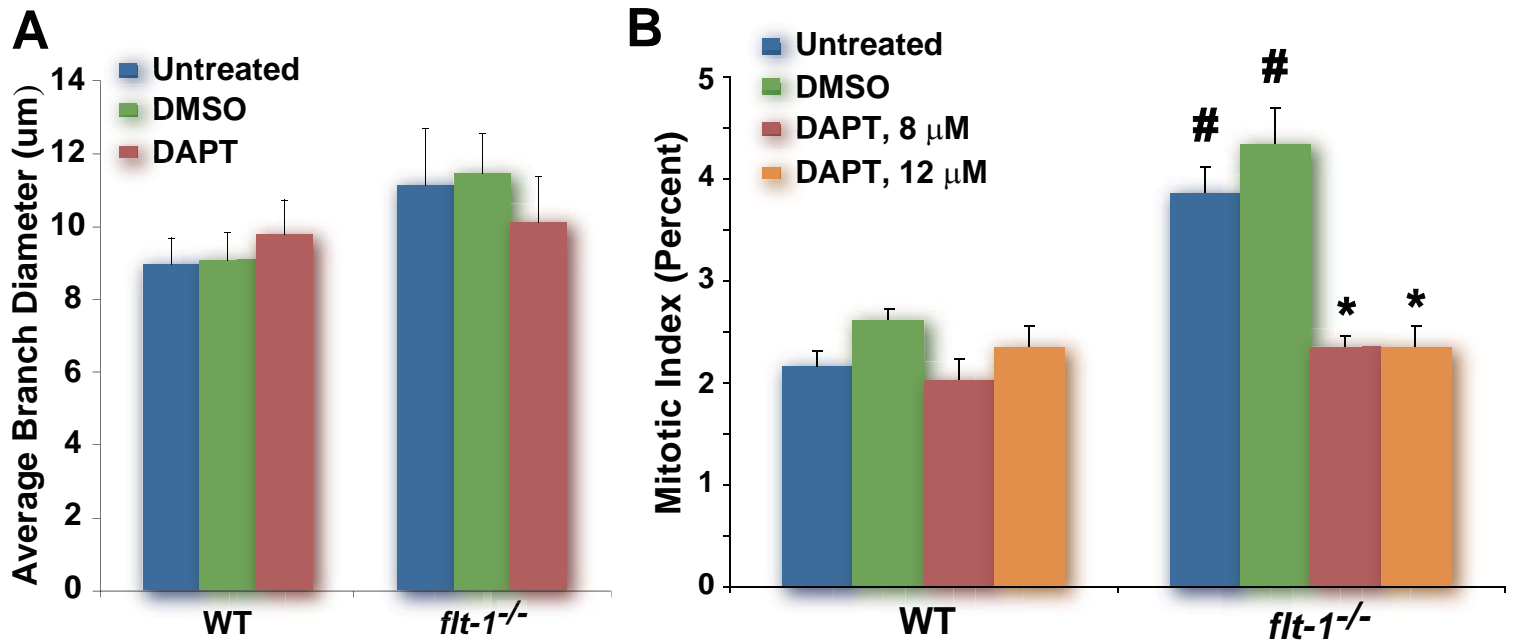

Supplement: NIHMS500345-supplement-6.pdf [file NIHMS500345-supplement-6.pdf]
